# Supplementary material
Source: PubMed Central journal article supplement (PMC3387351)

Fig.E1

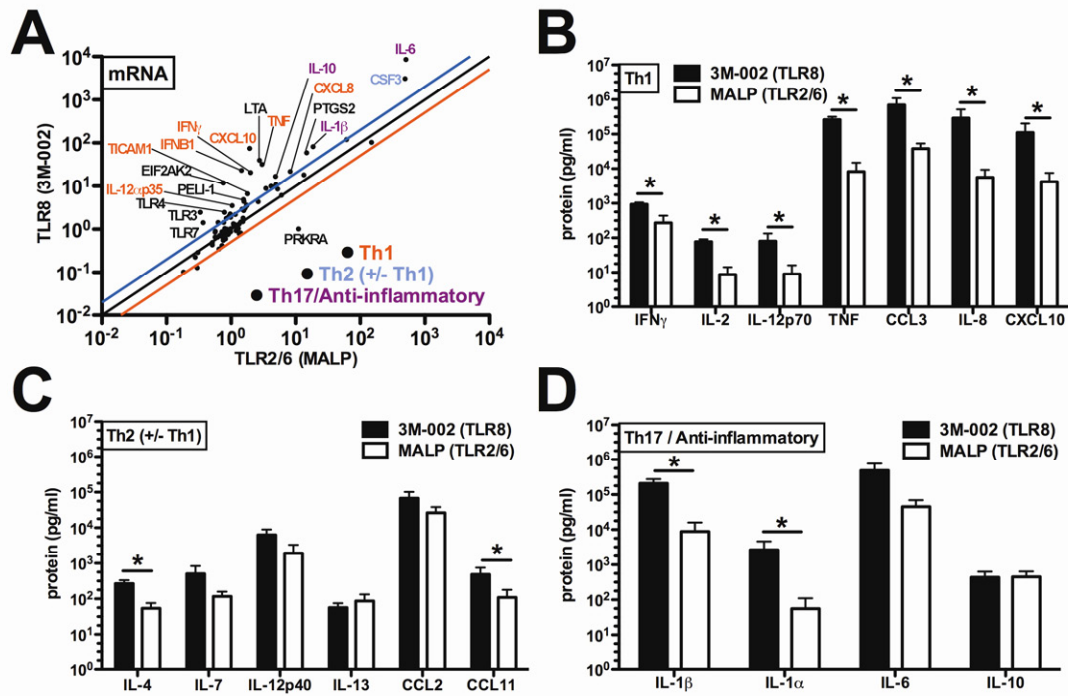

Fig.E2

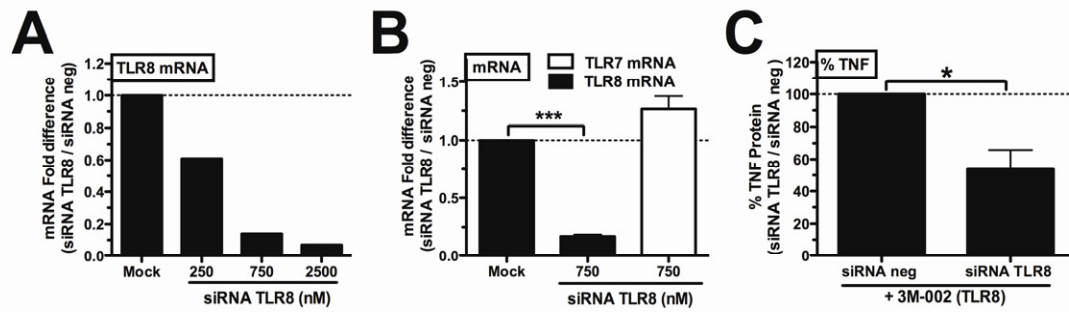

Fig.E3

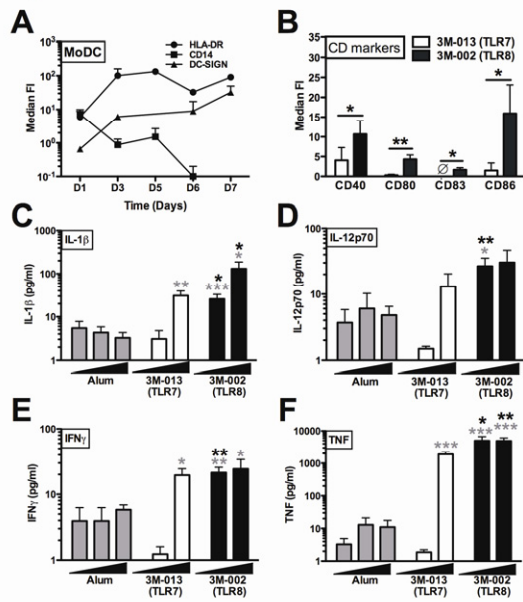

Fig.E4

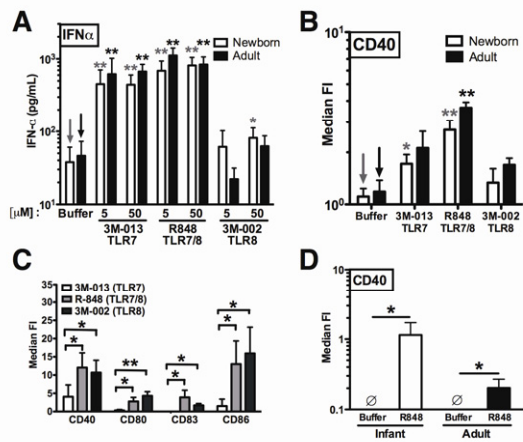

Fig.E5

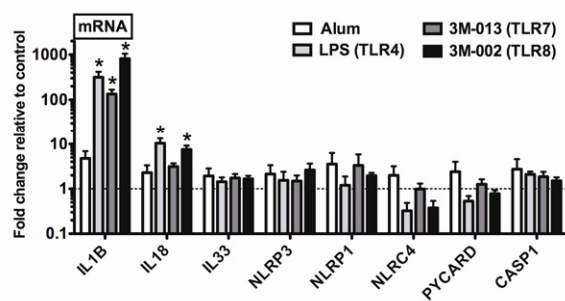

Fig.E6

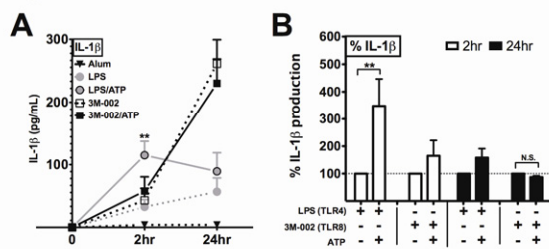

Fig.E7

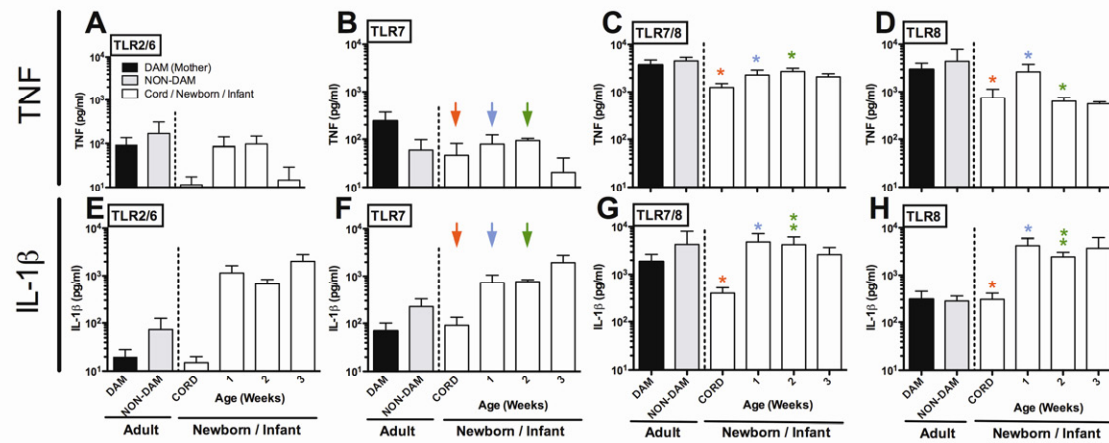

Supplement: NIHMS362085-supplement-supplement_1.pdf [file NIHMS362085-supplement-supplement_1.pdf]
